# Supplementary material for: Approaching the activity limit of CoSe2 for oxygen evolution via Fe doping and Co vacancy
Source: PubMed Central journal article supplement (PMC7125230; doi:10.1038/s41467-020-15498-0), 2020-04-03
Supplement: 41467_2020_15498_MOESM1_ESM.pdf [file 41467_2020_15498_MOESM1_ESM.pdf]

## **Supplementary Information**

# **Approaching the Activity Limit of CoSe<sub>2</sub> for Oxygen Evolution via Fe Doping and Co Vacancy**

Dou et al.

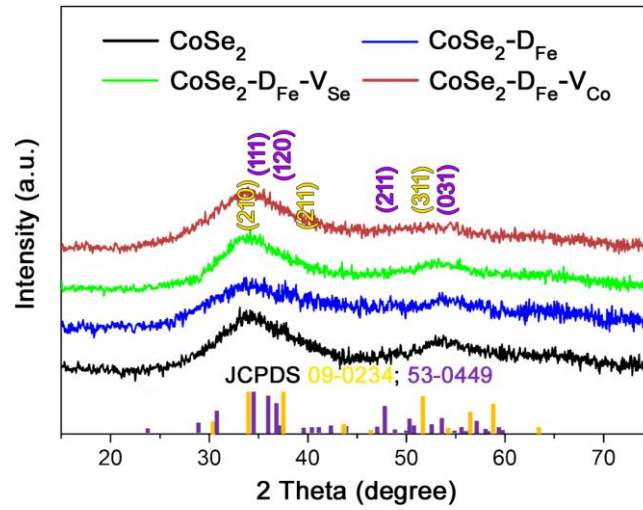

**Supplementary Fig. 1 | X-ray diffraction patterns of different catalysts showing the mixed cubic (JCPDS 09-0234) and orthorhombic (JCPDS 53-0449) phases of  $\text{CoSe}_2$ .**

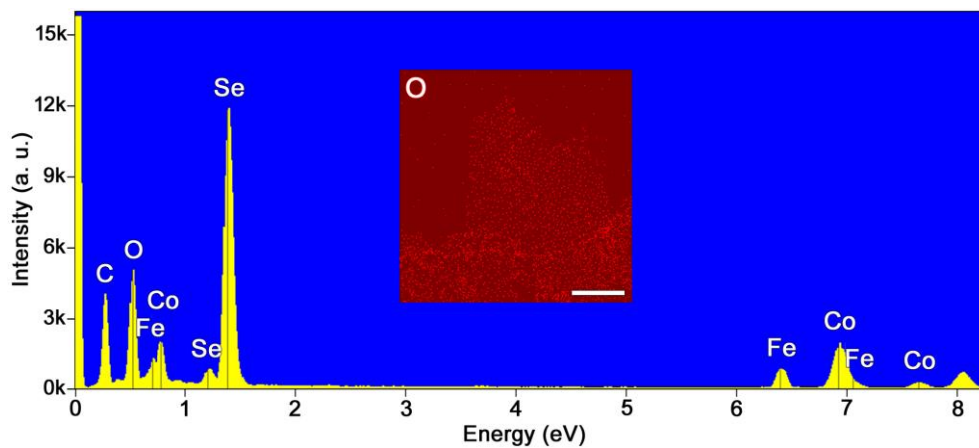

**Supplementary Fig. 2 | Energy dispersive X-ray spectroscopy pattern and elemental mapping showing the existence of O in CoSe<sub>2</sub>-D<sub>Fe</sub>-V<sub>Co</sub>. Scale bar, 300 nm.**

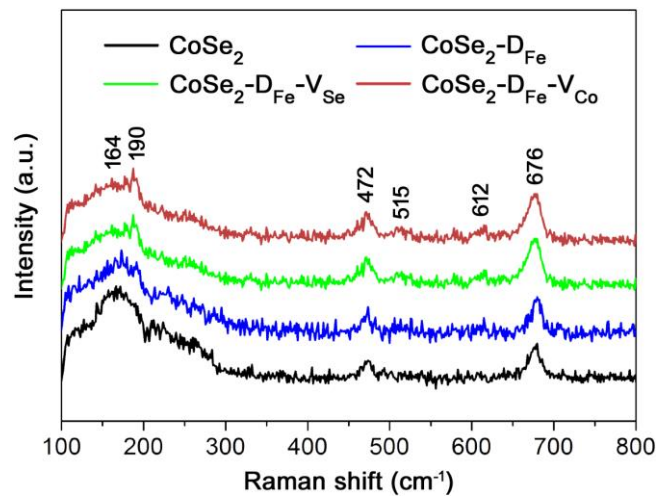

**Supplementary Fig. 3 | Raman spectra of CoSe<sub>2</sub> matrix with oxide impurities.**

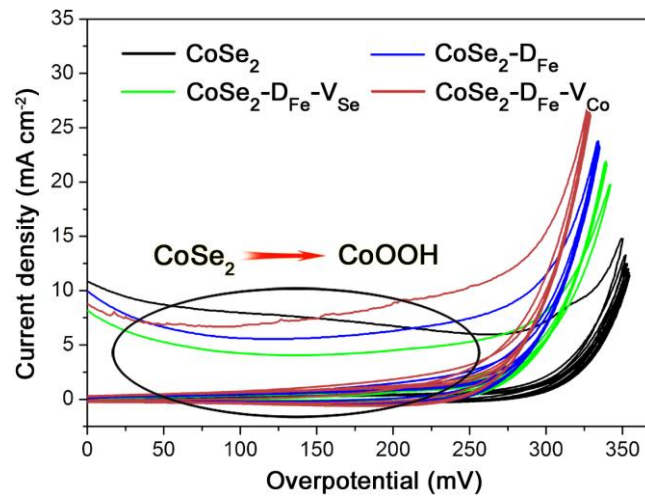

**Supplementary Fig. 4 | Cyclic voltammetry activation of different catalysts.** The catalysts undergo phase conversion in alkaline solution at anodic potentials.

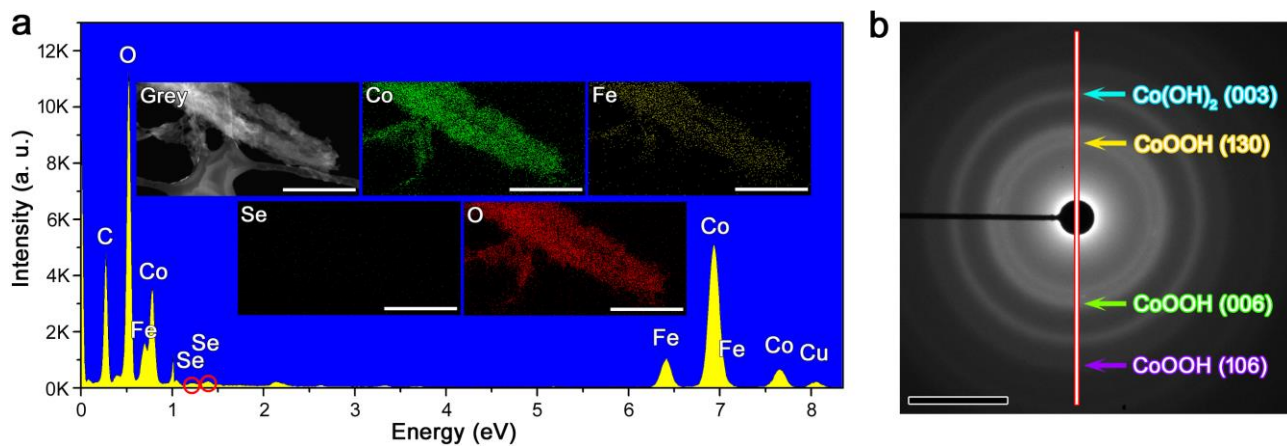

**Supplementary Fig. 5 | Phase characterization of  $\text{CoSe}_2\text{-D}_{\text{Fe}}\text{-V}_{\text{Co}}$  after cyclic voltammetry activation.** **a** Energy dispersive X-ray spectroscopy pattern and elemental mapping showing that almost no Se can be detected. Scale bar, 300 nm. **b** Selected area electron diffraction pattern illustrating the formation of CoOOH. Scale bar, 5  $1/\text{nm}$ .

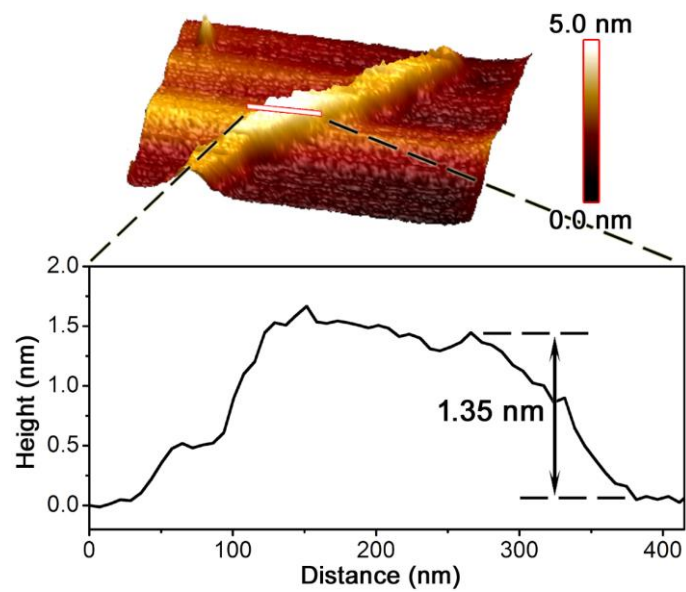

**Supplementary Fig. 6 | Atomic force microscopy image of CoSe<sub>2</sub>-D<sub>Fe</sub>-V<sub>Co</sub> after cyclic voltammetry activation and height profile along the white line in the image.**

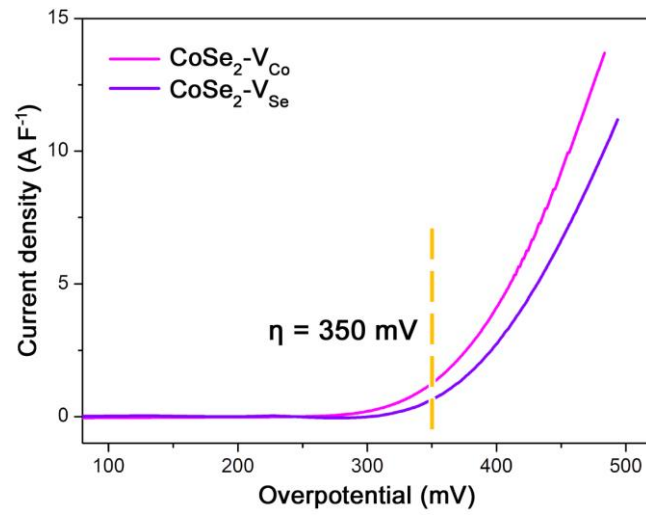

**Supplementary Fig. 7 | Linear sweep voltammetry curves of CoSe<sub>2</sub>-V<sub>Co</sub> and CoSe<sub>2</sub>-V<sub>Se</sub>.**



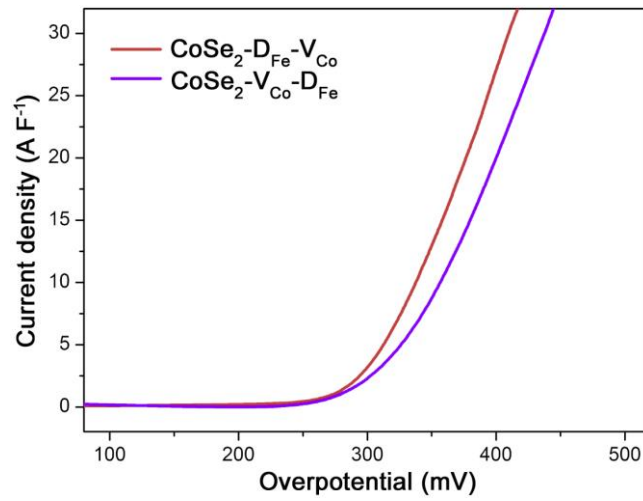

**Supplementary Fig. 8 | Performance comparison by changing the sequence of Fe doping and Co vacancy.**

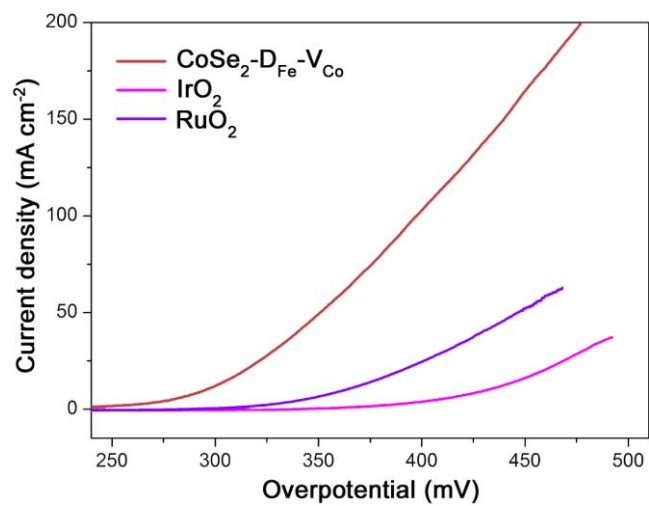

**Supplementary Fig. 9 | Linear sweep voltammetry curves of CoSe<sub>2</sub>-D<sub>Fe</sub>-V<sub>Co</sub>, IrO<sub>2</sub> and RuO<sub>2</sub>.**

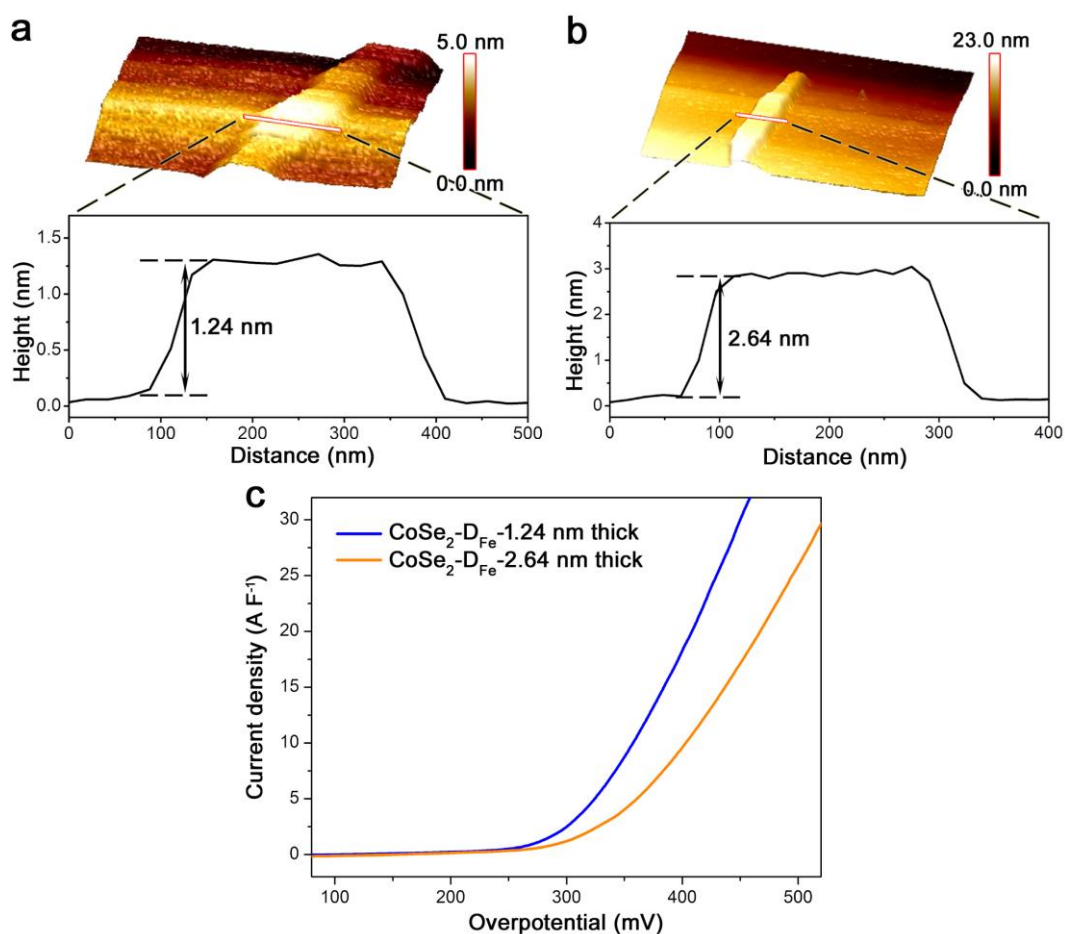

**Supplementary Fig. 10 | Effect of nanobelt thickness on catalytic performance for oxygen evolution reaction. a, b** Atomic force microscopy images and height profiles of  $\text{CoSe}_2\text{-D}_{\text{Fe}}$ -1.24 nm and  $\text{CoSe}_2\text{-D}_{\text{Fe}}$ -2.64 nm, prepared by low-power ultrasonication for 5 h and 2 h, respectively. **c** Linear sweep voltammetry curves of  $\text{CoSe}_2\text{-D}_{\text{Fe}}$ -1.24 nm and  $\text{CoSe}_2\text{-D}_{\text{Fe}}$ -2.64 nm normalized by electrochemical double-layer capacitance.

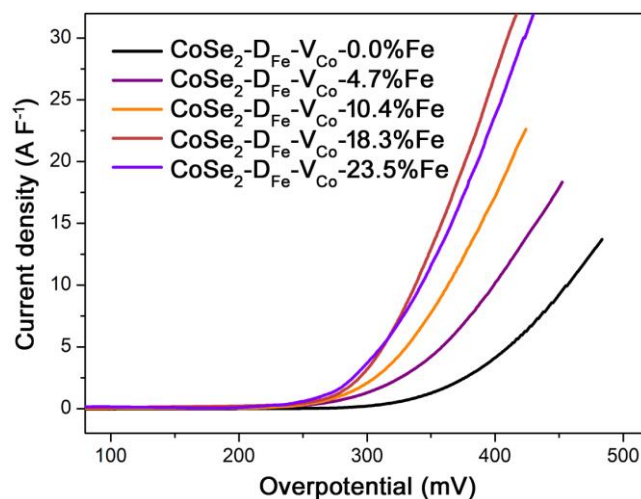

**Supplementary Fig. 11 | Effect of Fe doping level on OER catalytic activity.** The  $\text{CoSe}_2\text{-D}_{\text{Fe}}\text{-V}_{\text{Co}}$  catalysts with different Fe doping levels (0.0%, 4.7%, 10.4%, 18.3% and 23.5%) were fabricated by adding respectively 0.00, 0.25, 0.50, 1.00 and 2.00 ml of  $0.025 \text{ mol L}^{-1} \text{ Fe}(\text{NO}_3)_3$  aqueous solution into the  $\text{CoSe}_2$ /diethylenetriamine intermediates solution after hydrothermal reaction.

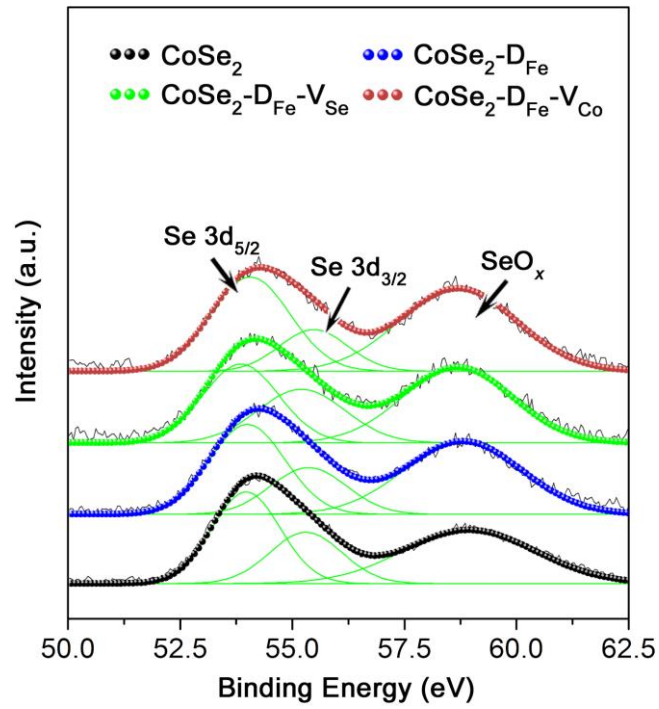

Supplementary Fig. 12 | Se 3d X-ray photoelectron spectroscopy spectra of primary catalysts.

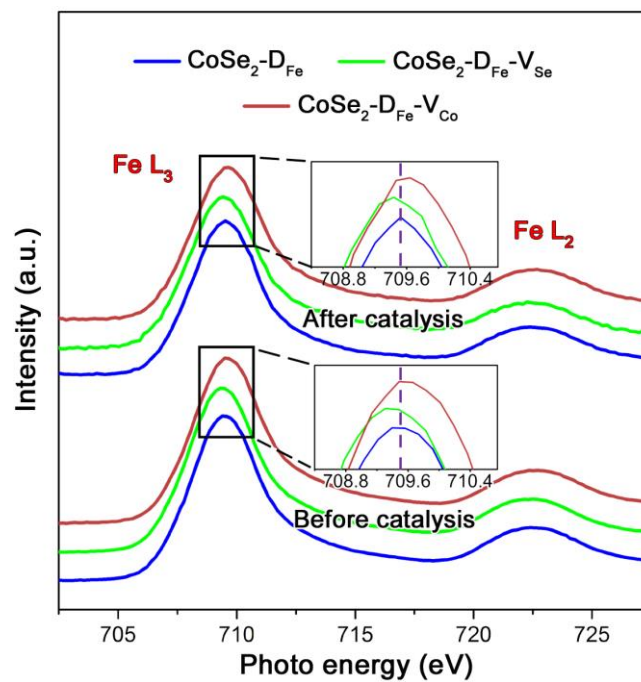

Supplementary Fig. 13 | Fe L-edge X-ray absorption near-edge structure spectra before and after catalysis showing the energy shift caused by defects.

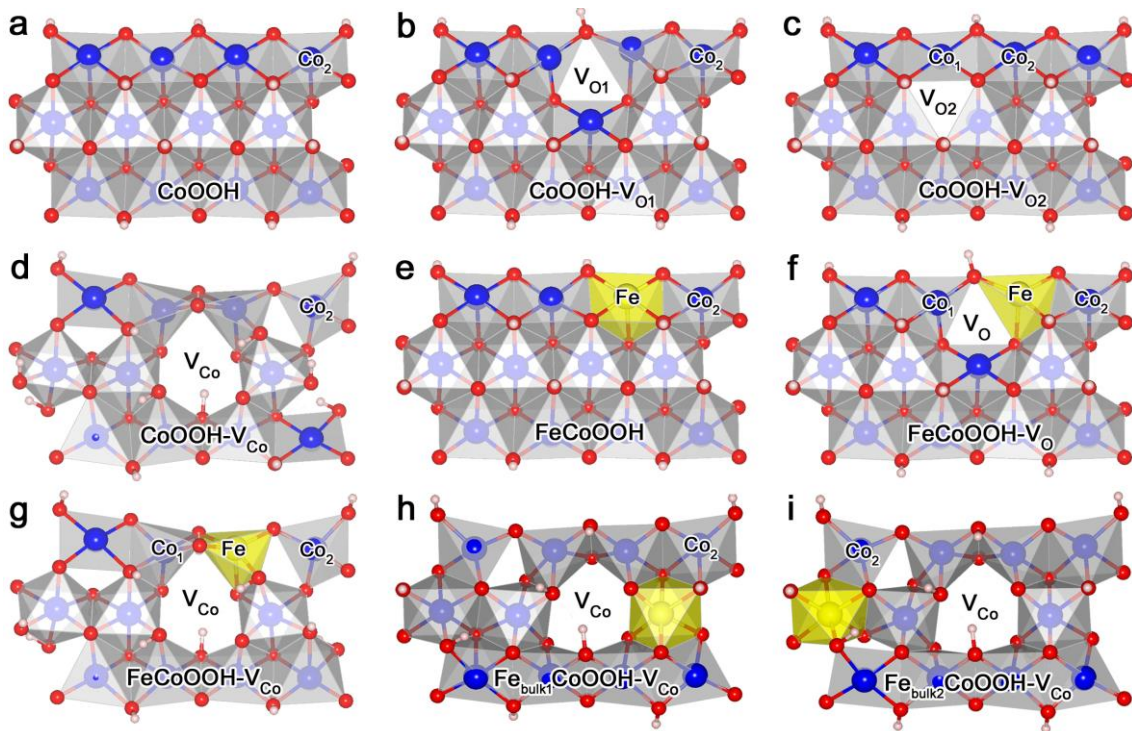

**Supplementary Fig. 14 | Potential active sites on (01-12) facets considered by Hubbard-corrected density functional theory calculations. a** Co<sub>2</sub> site in CoOOH. **b** Co<sub>2</sub> site in CoOOH-V<sub>O1</sub>. **c** Co<sub>1</sub> and Co<sub>2</sub> sites in CoOOH-V<sub>O2</sub>. **d** Co<sub>2</sub> site in CoOOH-V<sub>Co</sub>. **e** Fe and Co<sub>2</sub> sites in FeCoOOH. **f** Fe, Co<sub>1</sub> and Co<sub>2</sub> sites in FeCoOOH-V<sub>O</sub>. **g** Fe, Co<sub>1</sub> and Co<sub>2</sub> sites in FeCoOOH-V<sub>Co</sub>. **h** Co<sub>2</sub> site in Fe<sub>bulk1</sub>CoOOH-V<sub>Co</sub>. **i** Co<sub>2</sub> site in Fe<sub>bulk2</sub>-CoOOH-V<sub>Co</sub>.

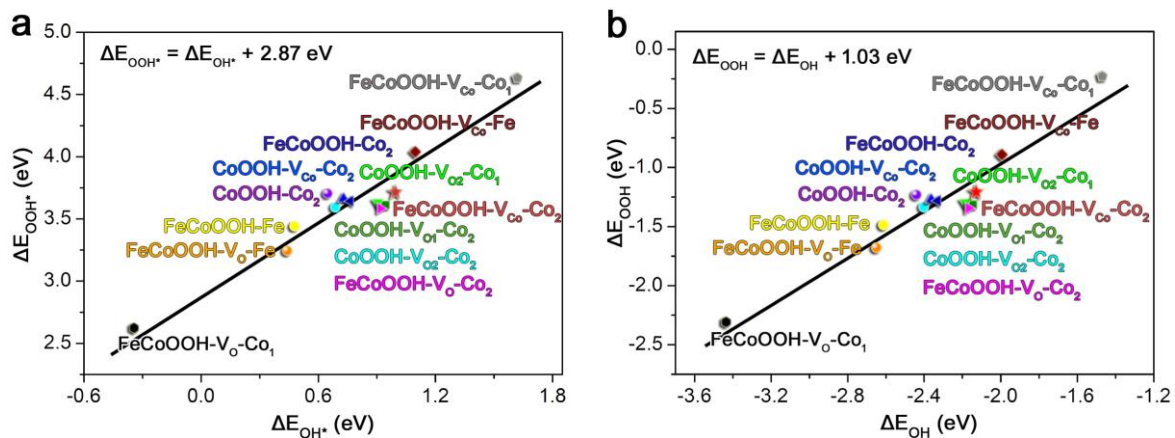

**Supplementary Fig. 15 | Scaling relations between energetics of OH\* and OOH\* intermediates.**

**a** Adsorption energy relation expressed by  $\Delta E_{\text{OOH}^*} = \Delta E_{\text{OH}^*} + 2.87 \text{ eV}$ . **b** Binding energy relation expressed by  $\Delta E_{\text{OOH}} = \Delta E_{\text{OH}} + 1.03 \text{ eV}$ .



**Supplementary Table 1 | Elemental contents before and after catalysis determined by inductively coupled plasma atomic emission spectroscopy.**

| Atom%                                                 |        | Co    | Fe   | Se   |
|-------------------------------------------------------|--------|-------|------|------|
| <b>CoSe<sub>2</sub></b>                               | Before | 42.5  | -    | 57.5 |
|                                                       | After  | 100.0 | -    | -    |
| <b>CoSe<sub>2</sub>-D<sub>Fe</sub></b>                | Before | 35.2  | 7.9  | 56.9 |
|                                                       | After  | 81.6  | 18.4 | -    |
| <b>CoSe<sub>2</sub>-D<sub>Fe</sub>-V<sub>Se</sub></b> | Before | 35.7  | 8.1  | 56.2 |
|                                                       | After  | 81.5  | 18.5 | -    |
| <b>CoSe<sub>2</sub>-D<sub>Fe</sub>-V<sub>Co</sub></b> | Before | 34.5  | 7.7  | 57.8 |
|                                                       | After  | 81.7  | 18.3 | -    |

**Supplementary Table 2 | Calculated energetics and overpotentials of different metal sites.**

|                                                              | Binding energies (eV) |              |                  | Adsorption energies (eV) |                  |                    |
|--------------------------------------------------------------|-----------------------|--------------|------------------|--------------------------|------------------|--------------------|
|                                                              | $\Delta E_{OH}$       | $\Delta E_O$ | $\Delta E_{OOH}$ | $\Delta E_{OH^*}$        | $\Delta E_{O^*}$ | $\Delta E_{OOH^*}$ |
| <b>CoOOH-Co<sub>2</sub></b>                                  | -2.4420               | -2.8235      | -1.2348          | 0.6490                   | 2.7990           | 3.6957             |
| <b>CoOOH-V<sub>O1</sub>-Co<sub>2</sub></b>                   | -2.1492               | -2.4708      | -1.3214          | 0.9420                   | 3.1510           | 3.6091             |
| <b>CoOOH-V<sub>O2</sub>-Co<sub>2</sub></b>                   | -2.4048               | -2.6862      | -1.3384          | 0.6870                   | 2.9360           | 3.5921             |
| <b>CoOOH-V<sub>O2</sub>-Co<sub>1</sub></b>                   | -2.1881               | -2.5645      | -1.3035          | 0.9030                   | 3.0580           | 3.6270             |
| <b>CoOOH-V<sub>Co</sub>-Co<sub>2</sub></b>                   | -2.3627               | -2.9336      | -1.2681          | 0.7290                   | 2.6880           | 3.6624             |
| <b>FeCoOOH-Co<sub>2</sub></b>                                | -2.3370               | -2.8874      | -1.2864          | 0.7550                   | 2.7350           | 3.6441             |
| <b>FeCoOOH-Fe</b>                                            | -2.6123               | -3.7023      | -1.4920          | 0.4790                   | 1.9200           | 3.4385             |
| <b>FeCoOOH-V<sub>O</sub>-Co<sub>2</sub></b>                  | -2.1786               | -2.5392      | -1.3350          | 0.9130                   | 3.0830           | 3.5955             |
| <b>FeCoOOH-V<sub>O</sub>-Co<sub>1</sub></b>                  | -3.4347               | -5.4055      | -2.3093          | -0.3430                  | 0.2170           | 2.6212             |
| <b>FeCoOOH-V<sub>O</sub>-Fe</b>                              | -2.6513               | -3.6679      | -1.6828          | 0.4400                   | 1.9540           | 3.2477             |
| <b>FeCoOOH-V<sub>Co</sub>-Co<sub>2</sub></b>                 | -2.1335               | -2.8095      | -1.2132          | 0.9950                   | 2.8130           | 3.7173             |
| <b>FeCoOOH-V<sub>Co</sub>-Co<sub>1</sub></b>                 | -1.4697               | -1.9658      | -0.2300          | 1.6220                   | 3.6560           | 4.6306             |
| <b>FeCoOOH-V<sub>Co</sub>-Fe</b>                             | -1.9944               | -2.9599      | -0.8939          | 1.0970                   | 2.6620           | 4.0366             |
| <b>Fe<sub>bulk1</sub>CoOOH-V<sub>Co</sub>-Co<sub>2</sub></b> | -2.6712               | -3.4722      | -1.9995          | 0.4203                   | 2.1509           | 2.9310             |
| <b>Fe<sub>bulk2</sub>CoOOH-V<sub>Co</sub>-Co<sub>2</sub></b> | -2.7096               | -3.4272      | -2.0428          | 0.3819                   | 2.1948           | 2.8877             |

| Gibbs free energies (eV) |                  |                    |                  | Gibbs free energy changes (eV) |              |              |              | $\eta^{OER}$<br>(mV) |
|--------------------------|------------------|--------------------|------------------|--------------------------------|--------------|--------------|--------------|----------------------|
| $\Delta G_{OH^*}$        | $\Delta G_{O^*}$ | $\Delta G_{OOH^*}$ | $\Delta G_{O_2}$ | $\Delta G_1$                   | $\Delta G_2$ | $\Delta G_3$ | $\Delta G_4$ |                      |
| 1.0392                   | 2.8185           | 4.1157             | 4.9200           | 1.0392                         | 1.7793       | 1.2972       | 0.8043       | 549                  |
| 1.3323                   | 3.1712           | 4.0291             | 4.9200           | 1.3323                         | 1.8389       | 0.8579       | 0.8909       | 609                  |
| 1.0767                   | 2.9558           | 4.0121             | 4.9200           | 1.0767                         | 1.8791       | 1.0563       | 0.9079       | 649                  |
| 1.2934                   | 3.0775           | 4.0470             | 4.9200           | 1.2934                         | 1.7841       | 0.9695       | 0.8730       | 554                  |
| 1.1188                   | 2.7084           | 4.0824             | 4.9200           | 1.1188                         | 1.5896       | 1.3740       | 0.8376       | 360                  |
| 1.1445                   | 2.7546           | 4.0641             | 4.9200           | 1.1445                         | 1.6101       | 1.3095       | 0.8559       | 380                  |
| 0.8692                   | 1.9397           | 3.8585             | 4.9200           | 0.8692                         | 1.0705       | 1.9188       | 1.0615       | 689                  |
| 1.3029                   | 3.1028           | 4.0155             | 4.9200           | 1.3029                         | 1.7999       | 0.9127       | 0.9045       | 570                  |
| 0.0468                   | 0.2365           | 3.0412             | 4.9200           | 0.0468                         | 0.1897       | 2.8047       | 1.8788       | 1575                 |
| 0.8302                   | 1.9741           | 3.6677             | 4.9200           | 0.8302                         | 1.1439       | 1.6936       | 1.2523       | 464                  |
| 1.3848                   | 2.8325           | 4.1373             | 4.9200           | 1.3848                         | 1.4477       | 1.3048       | 0.7827       | 218                  |
| 2.0118                   | 3.6762           | 5.0506             | 4.9200           | 2.0118                         | 1.6644       | 1.3744       | -0.1306      | 782                  |
| 1.4871                   | 2.6821           | 4.4566             | 4.9200           | 1.4871                         | 1.1950       | 1.7745       | 0.4634       | 545                  |
| 0.8103                   | 2.1709           | 3.3510             | 4.9200           | 0.8103                         | 1.3606       | 1.1801       | 1.5690       | 339                  |
| 0.7719                   | 2.2148           | 3.3077             | 4.9200           | 0.7719                         | 1.4429       | 1.0929       | 1.6123       | 382                  |
